# Supplementary material for: Spatial mapping of key plant functional traits in terrestrial ecosystems across China
Source: Copernicus journal article supplement (doi:10.5194/essd-16-1771-2024), 2024-04-11
Supplement: Supplementary file 1 [file essd-16-1771-2024-supplement.pdf]

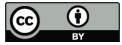

*Supplement of*

## **Spatial mapping of key plant functional traits in terrestrial ecosystems across China**

**Nannan An et al.**

*Correspondence to:* Nan Lu ([nanlv@rcees.ac.cn](mailto:nanlv@rcees.ac.cn)) and Fuzhong Wu ([wufzchina@163.com](mailto:wufzchina@163.com))

The copyright of individual parts of the supplement might differ from the article licence.

# Supplement

## Data collection from literature

- An H. and Shangguan Z. P. Photosynthetic characteristics of dominant plant species at different succession stages of vegetation on Loess Plateau. *Chinese Journal of Applied Ecology*, 2007, 18, 1175-1180.
- Bai K. D., Jiang D. B., Wan C. X. Photosynthesis-nitrogen relationship in evergreen and deciduous tree species at different altitudes on Mao'er Mountain, Guangxi. *Acta Ecologica Sinica*, 2013, 33, 4930-4938.
- Bai W. J., Zheng F. L., Dong L. L., et al. Leaf traits of species in different habits in the water-wind erosion region of the Loess Plateau. *Acta Ecologica Sinica*, 2010, 30, 2529-2540.
- Chai Y F., Shang H. L., Zhang X. F., et al. Ecological variations of woody species along an altitudinal gradient in the Qinling Mountains of Central China: area-based versus mass-based expression of leaf traits. *Journal of Forestry Research*, 2021, 32, 599-608.
- Chang Y. N., Zhong Q. L., Cheng D. L., et al. Stoichiometric characteristics of C, N, P and their distribution pattern in plants of *Castanopsis carlesii* natural forest in Youxi. *Journal of Plant Resources and Environment*, 2013, 22, 1-10.
- Chen F. Y., Luo T. X., Zhang L., et al. Comparison of leaf construction cost in dominant tree species of the evergreen broadleaved forest in Jiulian Mountain, Jiangxi Province. *Acta Ecologica Sinica*, 2006, 26, 2485-2493.
- Chen H. Y., Huang Y. M., He K. J., et al. Temporal intraspecific trait variability drives responses of functional diversity to interannual aridity variation in grasslands. *Ecology and Evolution*, 2018, 9, 5731-5742.
- Chen L. X., Xiang W. H., Wu H. L., et al. Tree growth traits and social status affect the wood density of pioneer species in secondary subtropical forest. *Ecology and Evolution*, 2017, 7, 5366-5377.
- Chen L., Yang X. G., Song N. P., et al. Leaf water uptake strategy of plants in the arid-semiarid region of Ningxia. *Journal of Zhejiang University*, 2013, 39, 565-574.
- Chen Y. H., Han W. X., Tang L. Y., et al. Leaf nitrogen and phosphorus concentrations of woody plants differ in responses to climate, soil and plant growth form. *Ecography*, 2011, 36, 178-184.
- Cheng J. H., Chu P. F., Chen D. M., et al. Functional correlations between specific leaf area and specific root length along a regional environmental gradient in Inner Mongolia grasslands. *Functional Ecology*, 2016, 30, 985-997.
- Cheng W., Yu C. H., Xiong K. N., et al. Leaf functional traits of dominant species in karst plateau-canyon areas. *Guihaia*, 2019, 39, 1039-1049.
- Dong H. and Shekhar R. B. Negative relationship between interspecies spatial association and trait dissimilarity. *Oikos*, 2019, 128, 659-667.
- Dong T. F., Feng Y. L., Lei Y. B., et al. Comparison on leaf functional traits of main dominant woody species in wet and dry habitats. *Chinese Journal of Ecology*, 2012, 31, 1043-1049.
- Du H. D. Ecological responses of foliar anatomical structural & physiological characteristics of dominant plants at different site conditions in north Shaanxi Loss Plateau. 2010, Graduation Thesis.
- Fan Z. X., Zhang S. B., Hao G. Y., et al. Hydraulic conductivity traits predict growth rates and adult stature of 40 Asian tropical tree species better than wood density. *Journal of Ecology*, 2012, 100, 732-741.
- Feng J B., Fan S. X., Hou Y. F., et al. Interspecific and intraspecific variation of leaf function traits of herbaceous plants in a forest-steppe zone, Hebei Province, China. *Journal of Northeast Forestry University*, 2021, 49, 23-28.
- Feng Q. H. The study on the response of foliar  $\delta^{13}\text{C}$  of different life from plants to altitude in subalpine area of Western Sichuan, China. 2011, Graduation Thesis.
- Fu P. L., Zhu S. D., Zhang J. L., et al. The contrasting leaf functional traits between a karst forest and a nearby non-

- karst forest in south-west China. *Functional Plant Biology*, 2019, 46, 907-915.
- Gao S. P., Li J. X., Xu M. C., et al. Leaf N and P stoichiometry of common species in successional stages of the evergreen broad-leaved forest in Tiantong National Forest Park, Zhejiang Province, China. *Acta Ecologica Sinica*, 2007, 27, 947-952.
- Geekiyana N., Goodale, U. M., Cao, K. F., et al. Leaf trait variations associated with habitat affinity of tropical karst tree species. *Ecology and Evolution*, 2017, 8, 286-295.
- Geng Y., Ma W. H., Wang L., et al. Linking above- and belowground traits to soil and climate variables: an integrated database on China's grassland species. *Ecology*, 2017, 98, 1471.
- Guo F. C. The photosynthetic characteristics of precious broad-leaved tree species in south subtropics and their relationship with leaf functional traits. 2015, Graduation Thesis.
- Guo W. J. Exploring the relationship between arbuscular mycorrhizal fungi and plant based on phylogeny and plant traits. 2015, Graduation Thesis.
- Hau C. H. Tree seed predation on degraded hillsides in Hong Kong. *Forest Ecology & Management*. 1997, 99, 215-221.
- He J. S., Wang Z. H., Wang X. P., et al. A test of the generality of leaf trait relationships on the Tibetan Plateau. *New Phytologist*, 2006, 170, 835-848.
- He P. C., Wright I. J., Zhu S. D., et al. Leaf mechanical strength and photosynthetic capacity vary independently across 57 subtropical forest species with contrasting light requirements. *New Phytologist*, 2019, 223, 607-618.
- He Y. T. Studies on physioecological traits of 30 plant species in the Subalpine Meadow of the Qinling Mountains. 2007, Graduation Thesis.
- Hou M. M. Adaptive evolution of some species from sedges (*Carex Cyperaceae*) based on phylogeny and leaf functional traits to habitat in the Poyang Lake Area. 2017, Graduation Thesis.
- Hou Y., Liu M. X., Sun H. R., et al. Response of plant leaf traits to microhabitat change in a subalpine meadow on the eastern edge of Qinghai-Tibetan Plateau, China. *Chinese Journal of Applied Ecology*, 2017, 28, 71-79.
- Hu Z. Z., Michaletz S. T., Johnson D. J., et al. Traits drive global wood decomposition rates more than climate. *Global Change Biology*, 2018, 24, 5259-5269.
- Hua L., He P., Goldstein G., et al. Linking vein properties to leaf biomechanics across 58 woody species from a subtropical forest. *Plant Biology*, 2019, 22, 212-220.
- Huang J. J. and Wang X. H. Leaf nutrient and structural characteristics of 32 evergreen broad-leaved species. *Journal of East China Normal University (Natural Science)*, 2003, 1, 92-97.
- Huang Y. L. The research about the turnover patterns and moisture adaptation mechanism of major species on the South-North-facing slope. 2012, Graduation Thesis.
- Iida Y., Kohyama T. S., Swenson N. G., et al. Linking functional traits and demographic rates in a subtropical tree community: the importance of size dependency. *Journal of Ecology*, 2014, 102, 641-650.
- Jia Q. Q. Functional traits of fine roots and their relationship with leaf traits of 50 major species in a subtropical forest in Gutianshan. 2011, Graduation Thesis.
- Jiang Y., Chen X., Ma J., et al., Interspecific and intraspecific variation in functional traits of subtropical evergreen and deciduous broadleaved mixed forests in karst topography, Guilin, Southwest China. *Tropical Conservation Science*, 2016, 9.
- Jin Y., Wang C. K., Zhou Z. H., et al. Co-ordinated performance of leaf hydraulics and economics in 10 Chinese temperate tree species. *Functional Plant Biology*, 2016, 43, 1082-1090.
- Jing G. H. Responses of grassland community structure and functions to management practices on the semi-arid area of Loess Plateau. 2017, Graduation Thesis.
- Kang M. Spatial distribution pattern and its causes of woody plant functional traits in Tiantong region, Zhejiang

- Province. 2012, Graduation Thesis.
- Krober W., Li Y., Hardtle W., et al. Early subtropical forest growth is driven by community mean trait values and functional diversity rather than the abiotic environment. *Ecology and Evolution*, 2015, 5, 3541-3556.
- Krober W., Bohnke M., Welk E., et al. Leaf trait-environment relationships in a subtropical broadleaved forest in south-east China. *PLoS One*, 2012, 7, e35742.
- Krober W., Zhang, S. R. Ehmiq, M., et al. Linking xylem hydraulic conductivity and vulnerability to the leaf economics spectrum-a cross-species study. *PLoS One*, 2014, e109211.
- Li F. Comparison of functional traits in semi-humid evergreen broad-leaved in Western Hill of Kunming. 2011, Graduation Thesis.
- Li K. and Xiang W. H. Comparison of specific leaf area, SPAD value and seed mass among subtropical tree species in hilly area of Central Hunan, China. *Journal of Central South University of Forestry & Technology*, 2011, 31, 213-218.
- Li L., McCormack M. L., Ma C.G., et al. Leaf economics and hydraulic traits are decoupled in five species-rich tropical-subtropical forests. *Ecology Letters*, 2015, 18, 899-906.
- Li Q. Leaf functional traits and their relationships with environmental factors in Beishan Mountain of Jinhua, Zhejiang Province. 2020, Graduation Thesis.
- Li S. J., Su P. X., Zhang H. N., et al. Characteristics and relationships of foliar water and leaf functional traits of desert plants. *Plant Physiology Journal*, 2013, 49, 153-160.
- Li W. H., Xu F. W., Zheng S. X., et al. Patterns and thresholds of grazing-induced changes in community structure and ecosystem functioning: species-level responses and the critical role of species traits. *Journal of Applied Ecology*, 2017, 54, 963-975.
- Li W. Q., Xu Q., Li J., et al. Quantification of ecotone width of returned forest land from farmland based on specific leaf area. *Journal of West China Forestry Science*, 2017, 46, 117-121.
- Li X. F., Pei K. Q., Kery M., et al. Decomposing functional trait associations in a Chinese subtropical forest. *PLoS One*, 2017, 12, e0175727.
- Li X. F., Schmid B., Wang F., et al. Net assimilation rate determines the growth rates of 14 species of subtropical forest trees. *PLoS One*, 2016, 11, e0150644.
- Li X. L., Li X. H., Jiang D. M., et al. Leaf morphological characters of 22 compositae herbaceous species in Horqin sandy land. *Chinese Journal of Ecology*, 2005, 24, 1397-1401.
- Li Y. H., Luo T. X., Lu Q., et al. Comparisons of leaf traits among 17 major plant species in Shazhuyu Sand Control Experimental Station of Qinghai Province. *Acta Ecologica Sinica*, 2005, 25, 994-999.
- Li Y. L., Meng Q. T., Zhao X. Y., et al. Relationships of fresh leaf traits and leaf litter decomposition in Kerqin Sandy Land. *Acta Ecologica Sinica*, 2008, 28, 2486-2494.
- Li Y., Yao J., Yang S., et al. Trait differences research on leaf function of Liaodong oak forest main species in Dongling mountain. *Guangdong Agricultural Sciences*, 2012, 23, 159-162, 171.
- Liang X. Y., Ye Q., Liu H., et al. Wood density predicts mortality threshold for diverse trees. *New Phytologist*, 2021, 229, 3053-3057.
- Li, R., Zhu, S., Chen, H. Y. H., et al. Are functional traits a good predictor of global change impacts on tree species abundance dynamics in a subtropical forest? *Ecology Letters*, 2015, 18, 1181-1189.
- Li Y. Y., Shi H., Shao M. A. Cavitation resistance of dominant trees and shrubs in Loess hilly region and their relationship with xylem structure. *Journal of Beijing Forestry University*, 2010, 32, 8-13.
- Lin G. G., Guo, D. L., Li, L., et al. Contrasting effects of ectomycorrhizal and arbuscular mycorrhizal tropical tree species on soil nitrogen cycling: the potential mechanisms and corresponding adaptive strategies. *Oikos*, 2018, 127, 518-530.

- Liu C. H. and Li Y. Y. Relationship between leaf traits and PV curve parameters in the typical deciduous woody plants occurring in Southern Huanglong Mountain. *Journal of Northwest Forestry University*, 2013, 28, 1-5.
- Liu G. F., Freschet G. T., Pan X., et al. Coordinated variation in leaf and root traits across multiple spatial scales in Chinese semi-arid and arid ecosystems. *New Phytologist*, 2010, 188, 543-553.
- Liu G. F., Wang L., Jiang L., et al. Specific leaf area predicts dryland litter decomposition via two mechanisms. *Journal of Ecology*, 2017, 106, 218-229.
- Liu J. H., Zeng D. H. and Don K. L. Leaf traits and their interrelationships of main plant species in southeast Horqin sandy land. *Chinese Journal of Ecology*, 2006, 25, 921-925.
- Liu J. X., Chen J., Jiang M. X., et al. Leaf traits and persistence of relict and endangered tree species in a rare plant community. *Functional Plant Biology*, 2012, 39, 512-518.
- Liu L. H. The traits and adaptive strategies of main herbaceous plants and lianas on micro-topographical units in Huangcangyu reserves of Anhui Province. 2012, Graduation Thesis.
- Liu M. C., Kong D. L., Lu X. R., et al. Higher photosynthesis, nutrient- and energy-use efficiencies contribute to invasiveness of exotic plants in a nutrient poor habitat in northeast China. *Physiologia Plantarum*, 2017, 160, 373-382.
- Liu R. H., Bai J. L., Bao H., et al. Variation and correlation in functional traits of main woody plants in the *Cyclobalanopsis glauca* community in the karst hills of Guilin, southwest China. *Chinese Journal of Plant Ecology*, 2020, 44, 828-841.
- Liu W. D., Su J. R., Li S. F., et al. Stoichiometry study of C, N and P in plant and soil at different successional stages of monsoon evergreen broad-leaved forest in Pu'er, Yunnan Province. *Acta Ecologica Sinica*, 2010, 30, 6581-6590.
- Liu X. C., Jia H. B., Wang Q. Y. Genetic variation and correlation in wood properties of *Betula platyphlla* in natural Stands. *Journal of Northeast Forestry University*, 2018, 36, 8-10.
- Liu Y. Y. Spatial distribution and habitat associations of trees in a typical mixed broad-leaved Korean pine (*Pinus koraiensis*) forest. 2014, Graduation Thesis.
- Luo Y. H., Cadotte M. W., Burgess K. S., et al. Greater than the sum of the parts: how the species composition in different forest strata influence ecosystem function. *Ecology Letters*, 2019, 22, 1449-1461.
- Lv J. Z., Miao Y. M., Zhang H. F., et al. Comparisons of leaf traits among different functional types of plant from Huoshan Mountain in the Shanxi Province. *Plant Science Journal*, 2010, 28, 460-465.
- Ma J., Wu L. F., Wei X., et al. Habitat adaptation of two dominant tree species in a subtropical monsoon forest: leaf functional traits and hydraulic properties. *Guihaia*, 2015, 35, 261-268.
- Mo J. M., Zhang D. Q., Huang Z. L., et al. Distribution pattern of nutrient elements in plants of Dinghushan Lower Subtropical Evergreen Broad-Leaved Forest. *Journal of Tropical and Subtropical Botany*, 2000, 8, 198-206.
- Niu C. Y., Meinzer F. C. and Hao G. Y. Divergence in strategies for coping with winter embolism among co-occurring temperate tree species: the role of positive xylem pressure, wood type and tree stature. *Functional Ecology*, 2017, 31, 1550-1560.
- Niu D. C., Li Q., Jiang S. G., et al. Seasonal variations of leaf C:N:P stoichiometry of six shrubs in desert of China's Alxa Plateau. *Chinese Journal of Plant Ecology*, 2013, 37, 317-325.
- Niu K. C., He J. S. and Lechowicz M. J. Grazing-induced shifts in community functional composition and soil nutrient availability in Tibetan alpine meadows. *Journal of Applied Ecology*, 2016, 53, 1554-1564.
- Niu K. C., Zhang S. and Lechowicz M. Harsh environmental regimes increase the functional significance of intraspecific variation in plant communities. *Functional Ecology*, 2020, 34, 1666-1677.
- Niu S. L. Photosynthesis research on the predominant legume species in Hunshandak Sandland. 2004, Graduation Thesis.

- Qi L. X. Response of leaf traits of *Pinus mongoliensis* and *Pinus massoniana* to elevation gradient in Daiyun Mountain. 2015, Graduation Thesis.
- Ren Q. J., Li Q. J., Bu H. Y., et al. Comparison of physiological and leaf morphological traits for photosynthesis of the 51 plant species in the Maqu alpine swamp meadow. *Chinese Journal of Plant Ecology*, 2015, 39, 593-603.
- Ren Y. T. The study of leaf functional traits of typical plants across the Alashan Desert. 2017, Graduation Thesis.
- Ren Y., Wei C. G. and Guo X. Y. Comparison on leaf function traits of six kinds of plant in Ordos. *Journal of Inner Mongolia Forestry Science & Technology*, 2019, 45, 43-46, 55.
- Rios R. S., Salgado-Luarte C. and Gianoli E. Species divergence and phylogenetic variation of ecophysiological traits in lianas and trees. *PloS One*, 2007, 9, e99871.
- Shang K. K. Differentiation and maintenance of relict deciduous broad-leaved forest patterns along micro-topographic gradient in subtropical area, East China. 2011, Graduation Thesis.
- Song Y T. Study on functional plant ecology in Songnen Grassland Northeast China. 2012, Graduation Thesis.
- Song Y T., Zhou D. W., Li Q., et al. Leaf nitrogen and phosphorus stoichiometry in 80 herbaceous plant species of Songnen grassland in Northeast China. *Chinese Journal of Plant Ecology*, 2012, 36, 222-230.
- Tan X. Y. Research on leaf functional diversity of forest communities in rainy area of south-west China. 2014, Graduation Thesis.
- Tang Q. Q. Variation in functional traits of plants in the Subtropical Evergreen and Deciduous Broad-leaved Mixed Forest. 2016, Graduation Thesis.
- Tang Y. Inter-specific variations and relationship in leaf traits of major temperate species in northern China. 2011, Graduation Thesis.
- Tao J. P., Zuo J., He Z., et al. Traits including leaf dry matter content and leaf pH dominate over forest soil pH as drivers of litter decomposition among 60 species. *Functional Ecology*, 2019, 33, 1798-1810.
- Tian M., Yu G. R., He N. P., et al. Leaf morphological and anatomical traits from tropical to temperate coniferous forests: Mechanisms and influencing factors. *Scientific Reports*, 2016, 6, 19703.
- Wang B. Analysis of leaf functional traits of 13 species trees in northwestern Fujian Province. 2019, Graduation Thesis.
- Wang B. B. A study on ecological stoichiometry of six kinds of dominant shrubs in Huangcangyu Nature Reserve. 2015, Graduation Thesis.
- Wang G. H. Leaf trait co-variation, response and effect in a chronosequence. *Journal of Vegetation Science*, 2007, 18, 563-570.
- Wang G. H., Liu J. L. and Meng T. T. Leaf trait variation captures climate differences but differs with species irrespective of functional group. *Journal of Plant Ecology*, 2015, 8, 61-69.
- Wang J. Y., Wang S. Q., Li R. L., et al. C:N:P stoichiometric characteristics of four forest types' dominant tree species in China. *Chinese Journal of Plant Ecology*, 2011, 35, 587-595.
- Wang K. B. Vegetation ecological features and net primary productivity simulation in Yanggou watershed in the Loess hill-gully areas of China. 2011, Graduation Thesis.
- Wang S. S. The traits and adaptive strategies of main herbaceous plants and lianas on micro-topographical units in Longjishan reserves of Anhui Province. 2016, Graduation Thesis.
- Wei L. P. Variations in functional traits of main tree species along tree-crown in broadleaved Korean Pine Forest in Jiaohe, Jilin Province. 2014, Graduation Thesis.
- Wei L. P., Hou J. H. and Jiang S. S. Changes of leaf functional traits of two main species along tree height in broad-leaved Korean pine forest. *Guangdong Agricultural Sciences*, 2014, 12, 55-58, 71.
- Wei L. Y. and Shangguan Z. P. Relation between specific leaf areas and leaf nutrient contents of plants growing on slopelands with different farming-abandoned periods in the Loess Plateau. *Acta Ecologica Sinica*, 2008, 28,

2526-2535.

- Wei L. Y., Zhou J. W., Xiao H. G., et al. Variations in leaf functional traits among plant species grouped by growth and leaf types in Zhenjiang, China. *Journal of Forestry Research*, 2011, 28, 241-248.
- Wu D. H., Pietsch K. A., Staab M., et al. Wood species identity alters dominant factors driving fine wood decomposition along a subtropical plantation forests tree diversity gradient in subtropical plantation forests. *Biotropica*, 2021, 53, 643-657.
- Wu T. G., Chen B. F., Xiao Y. H., et al. Leaf stoichiometry of trees in three forest types in Pearl River Delta, South China. *Chinese Journal of Plant Ecology*, 2009, 34, 58-63.
- Xie Y. J. The characteristics of 20 dominant plant functional traits in evergreen broad-leaf forest in Daming Mountain Nature Reserve, Guangxi. 2013, Graduation Thesis.
- Xu M. F., Ke X. H., Zhang Y., et al. Wood densities of six hardwood tree species in Eastern Guangdong and influencing factors. *Journal of South China Agricultural University*, 2016, 37, 100-106.
- Xu M. S., Zhao Y. T., Yang X. D., et al. Geostatistical analysis of spatial variations in leaf traits of woody plants in Tiantong, Zhejiang Province. *Chinese Journal of Plant Ecology*, 2016, 40, 48-59.
- Xu Y. Z. Biomass estimate and storage mechanisms in northern subtropical forest ecosystems, central China. 2016, Graduation Thesis.
- Xun Y. H., Di X. Y. and Jin G. Z. Vertical variation and economic strategy of leaf trait of major tree species in a typical mixed broadleaved-Korean pine forest. *Chinese Journal of Plant Ecology*, 2020, 44, 730-741.
- Yan E. R., Wang X. H., Guo M., et al. C:N:P stoichiometry across evergreen broad-leaved forests, evergreen coniferous forests and deciduous broad-leaved forests in the Tiantong region, Zhejiang Province, eastern China. *Chinese Journal of Plant Ecology*, 2010, 34, 48-57.
- Yang S. The adaptive strategies of main herbaceous plants traits to different micro-topographical units in Dashushan Mountain, Hefei. 2017, Graduation Thesis.
- Yang Y., Xu X., Xu M., et al. Adaptation strategies of three dominant plants in the trough-valley karst region of northern Guizhou Province, Southwestern China, evidence from associated plant functional traits and ecostoichiometry. *Earth and Environment*, 2020, 48, 413-423.
- Yang Z., Fan S. X., Zhou B. C., et al. Leaf function and soil nutrient differences of dominant tree species on different slope aspects at the south foothills of Taihang Mountains. *Journal of Henan Agricultural University*, 2020, 54, 408-414.
- Yin Q. L., Wang L., Lei, M. L., et al. The relationships between leaf economics and hydraulic traits of woody plants depend on water availability. *Science of the Total Environment*, 2018, 621, 245-252.
- Yu Y. H., Zhong X. P. and Chen W. Analysis of relationship among leaf functional traits and economics spectrum of dominant species in northwestern Guizhou Province. *Journal of Forest and Environment*, 2018, 38, 196-201.
- Yuan S. Preliminary research on plant functional traits and the capability of carbon sequestration of major tree species in Changbai Mountain Area. 2011, Graduation Thesis.
- Zhang H., Chen H. Y. H., Lian J. Y., et al. Using functional trait diversity patterns to disentangle the scale-dependent ecological processes in a subtropical forest. *Functional Ecology*, 2018, 32, 1379-1389.
- Zhang J. G., Fu S. L., Wen Z. D., et al. Relationship of key leaf traits of 16 woody plant species in Low Subtropical China. *Journal of Tropical and Subtropical Botany*, 2009, 17, 395-400.
- Zhang J. L., Poorter L., Cao K. F. Productive leaf functional traits of Chinese savanna species. *Plant Ecology*, 2012, 213, 1449-1460.
- Zhang J. Y. Comparative study on the different plant functional groups leaf traits at the Maoershan Region. 2008, Graduation Thesis.
- Zhang Q. W., Zhu S. D., Jansen S., et al. Topography strongly affects drought stress and xylem embolism resistance

- in woody plants from a karst forest in Southwest China. *Functional Ecology*, 2020, 35, 566-577.
- Zhang S. B. and Cao K. F. Stem hydraulics mediates leaf water status, carbon gain, nutrient use efficiencies and plant growth rates across dipterocarp species. *Functional Ecology*, 2009, 23, 658-667.
- Zhang S. B., Cao K. F., Fan Z. X., et al. Potential hydraulic efficiency in angiosperm trees increases with growth-site temperature but has no trade-off with mechanical strength. *Global Ecology and Biogeography*, 2013, 22, 971-981.
- Zhang Y., Ren Y. X., Yao J., et al. Leaf nitrogen and phosphorous stoichiometry of trees in *Pinus tabulaeformis* Carr stands, North China. *Journal of Anhui Agricultural University*, 2012, 39, 247-251.
- Zhao Y. T., Ali, A. and Yan, E. R. The plant economics spectrum is structured by leaf habits and growth forms across subtropical species. *Tree Physiology*, 2016, 37, 173-185.
- Zheng X. J., Li S. and Li Y. Leaf water uptake strategy of desert plants in the Junggar Basin, China. *Chinese Journal of Plant Ecology*, 2011, 35, 893-905.
- Zheng Y. M. Carbon, nitrogen and phosphorus stoichiometry of plant and soil in the sandy hills of Poyang Lake. 2014, Graduation Thesis.
- Zheng Z. X. Comparison of plant leaf, height and seed functional traits in dry-hot valleys. 2010, Graduation Thesis.
- Zhou J. Y., He J. J., Guo Z. Y., et al. A study on specific leaf area and leaf dry matter content of five dominant species in Xiangshan Mountain, Huaibei City, Anhui Province. *Journal of Huaibei Normal University (Natural Sciences)*, 2013, 34, 51-54.
- Zhou X., Zuo X. A., Zhao X. Y., et al. Plant functional traits and interrelationship of 34 plant species in south central Horqin Sandy Land, China. *Journal of Desert Research*, 2015, 35, 1489-1495.
- Zhu B. R., Xu B. and Zhang D. Y. Extent and sources of variation in plant functional traits in grassland. *Journal of Beijing Normal University (Natural Science)*, 2011, 47, 485-489.
- Zhu S. D., Song J. J., Li R. H., et al. Plant hydraulics and photosynthesis of 34 woody species from different successional stages of subtropical forests. *Plant Cell and Environment*, 2013, 36, 879-891.
- Zhu X. B., Liu Y. M. and Sun S. C. Leaf expansion of the dominant woody species of three deciduous oak forests in Nanjing, East China. *Chinese Journal of Plant Ecology*, 2005, 29, 125-136.
